# Supplementary material for: High Clinical Value of Liquid Biopsy to Detect Circulating Tumor Cells and Tumor Exosomes in Pancreatic Ductal Adenocarcinoma Patients Eligible for Up-Front Surgery
Source: PubMed Central journal article supplement (PMC6895804; doi:10.3390/cancers11111656), 2019-10-26

# Supplementary Materials: High Clinical Value of Liquid Biopsy to Detect Circulating Tumor Cells and Tumor Exosomes in Pancreatic Ductal Adenocarcinoma Patients Eligible for Up-Front Surgery

Etienne Buscail, Catherine Alix-Panabières, Pascaline Quincy, Thomas Cauvin, Alexandre Chauvet, Olivier Degrandi, Charline Caumont, Séverine Verdon, Isabelle Lamrissi, Isabelle Moranvillier, Camille Buscail, Marion Marty, Christophe Laurent, Véronique Vendrely, François Moreau-Gaudry, Aurélie Bedel, Sandrine Dabernat and Laurence Chiche

Table S1. Clinical features of the cohort.

| Variables                   | PDAC Group (n = 22) (%) | Control GROUP (n = 28) (%) |
|-----------------------------|-------------------------|----------------------------|
| Age, year, (median; range)  | 68.8 (69.5; 57–81) *    | 58.3 (61;22–73) *          |
| Male gender, n (%)          | 13 (59)                 | 8 (28)                     |
| BMI (median; range)         | 24(25;18–35)            | 26.5(25; 18–45)            |
| ASA score                   |                         |                            |
| 1–2                         | 16 (72)                 | 19 (67)                    |
| ≥3                          | 6 (28)                  | 9 (33)                     |
| Smoking status              | 5 (22)                  | 12 (42)                    |
| First symptoms              |                         | IPMN (n = 8)               |
| Acute pancreatitis          | 0 (0)                   | 2(25)                      |
| Jaundice                    | 13 (59)                 | 0(0)                       |
| New onset of diabetes       | 0 (0)                   | 1(12.5)                    |
| Weight loss                 | 5 (22)                  | 0(0)                       |
| Diarrhea and/or steatorrhea | 0 (0)                   | 0(0)                       |
| Abdominal pain              | 3 (13)                  | 3(37.5)                    |
| No symptoms                 | 4 (18)                  | 3(37.5)                    |
| Serum CA 19-9               |                         |                            |
| Normal                      | 16 (72)                 | 23 (83)                    |
| Elevated                    | 6 (28)                  | 5 (17)                     |
| EUS-FNA                     | Total n = 13            |                            |
| Positive                    | n = 7 (54)              | Positive n = 0 (0)         |
| Negative                    | n = 6 (46)              | Negative n = 3 (100)       |

\* Statistically significant; IPMN are included in the control group. Abbreviations: med, median; PDAC, pancreatic ductal adenocarcinoma; IPMN, intraductal papillary and mucinous neoplasm; EUS-FNA, endoscopic ultrasound-guided fine needle aspiration; BMI, Body mass index; ASA, American society of anesthesiologists. Serum CA 19-9 was considered as elevated when greater than 37 UI/mL.

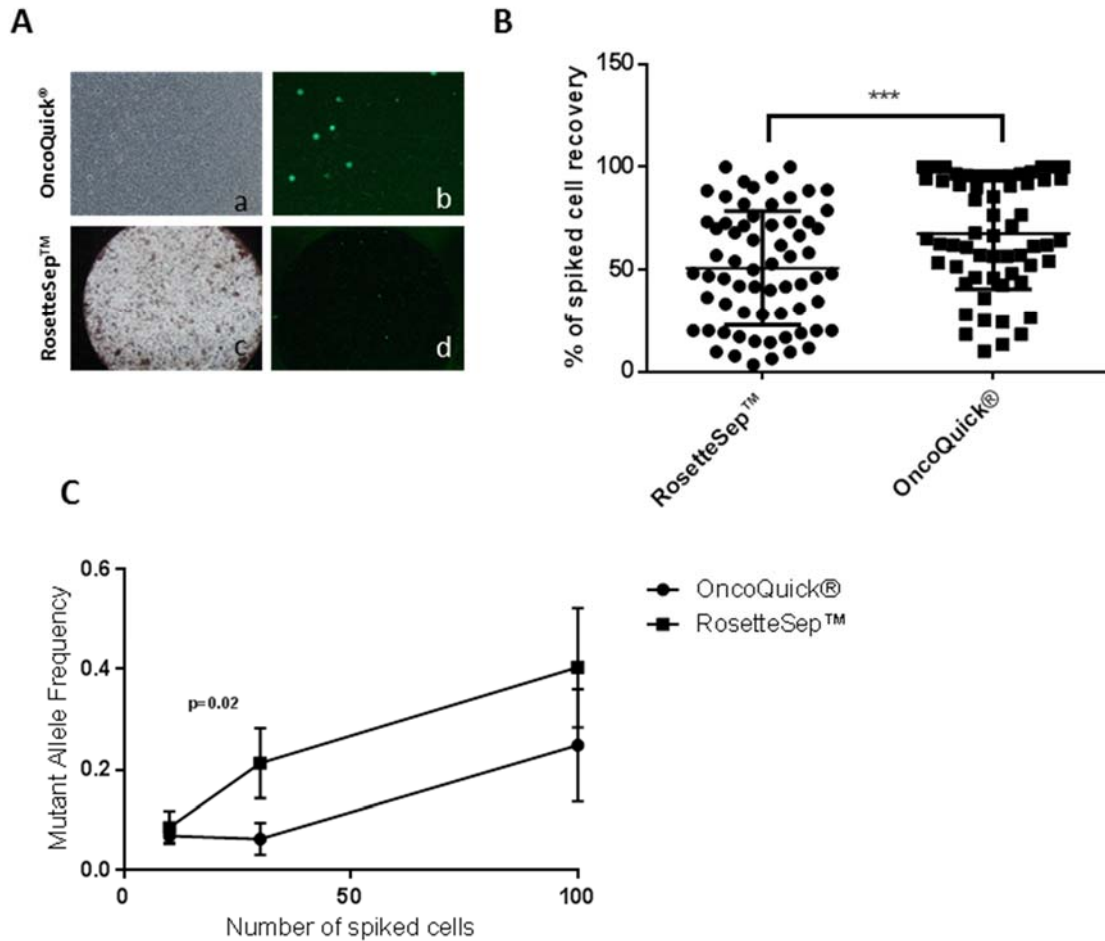

**Figure S1.** Tumor cell detection in cell spiking experiments. (A). 60-well plate pictures after fluorescent cell spiking and recovery images of tumor cells obtained after OncoQuick® enrichment (a, bright field; b, fluorescence) and RosetteSep™ enrichment (c, bright field; d, fluorescence) all images with original magnification  $\times 100$ . (B). Recovery efficiency for two methods. \*\*\*:  $p < 0.001$ : Cell count and tumor cell recovery after spiking experiments. Statistically greater count in Oncoquick® compared with RosetteSep™ paired analysis performed by Wilcoxon test ( $p < 0.001$ ). (C). Mutant allele frequency determined by ddPCR after enrichment according to spiked cells: Molecular detection of mutant *K-RAS* alleles by ddPCR after RosetteSep™ enrichment was 3- to 4-fold more sensitive than after OncoQuick®.

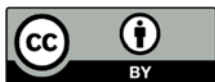

Supplement: cancers-11-01656-s001.pdf [file cancers-11-01656-s001.pdf]
